# Supplementary material for: Yeast-derived nanoparticles remodel the immunosuppressive microenvironment in tumor and tumor-draining lymph nodes to suppress tumor growth
Source: PubMed Central journal article supplement (PMC8748771; doi:10.1038/s41467-021-27750-2), 2022-01-10
Supplement: 41467_2021_27750_MOESM1_ESM.pdf [file 41467_2021_27750_MOESM1_ESM.pdf]

# **Yeast-Derived Nanoparticles Remodel the Immunosuppressive Microenvironment in Tumor and Tumor-draining Lymph Nodes to Suppress Tumor Growth**

Jialu Xu<sup>1</sup>, Qingle Ma<sup>1</sup>, Yue Zhang<sup>1</sup>, Ziyang Fei<sup>1</sup>, Yifei Sun<sup>2</sup>, Qin Fan<sup>1</sup>, Bo Liu<sup>1</sup>, Jinyu Bai<sup>3</sup>, Yue Yu<sup>1</sup>, Jianhong Chu<sup>4\*</sup>, Jingrun Chen<sup>2\*</sup>, Chao Wang<sup>1\*</sup>

<sup>1</sup> Institute of Functional Nano & Soft Materials (FUNSOM), Jiangsu Key Laboratory for Carbon-based Functional Materials and Devices, Soochow University, Suzhou, Jiangsu 215123, China

<sup>2</sup> School of Mathematical Sciences, Soochow University, Suzhou, Jiangsu 215006, China

<sup>3</sup> The Second Affiliated Hospital of Soochow University, Suzhou, Jiangsu 215004, China

<sup>4</sup> Institute of Blood and Marrow Transplantation, Jiangsu Institute of Hematology, Collaborative Innovation Center of Hematology, National Clinical Research Center for Hematological Diseases, Soochow University, Suzhou, Jiangsu 215123, China

\* Corresponding author: Chao Wang: [cwang@suda.edu.cn](mailto:cwang@suda.edu.cn), Jingrun Chen: [jingrunchen@suda.edu.cn](mailto:jingrunchen@suda.edu.cn), Jianhong Chu: [jhchu@suda.edu.cn](mailto:jhchu@suda.edu.cn)

Supplementary Table 1 Materials used in study.

Supplementary Fig. 1 The composition of YCW NPs.

Supplementary Table 2 Specific information on the proteins contained in YCW NPs.

Supplementary Table 3 Specific information of mass spectrometry data of monosaccharide.

Supplementary Fig. 2 Characterization of YCW NPs with different sizes.

Supplementary Fig. 3 In vitro cytotoxicity assessment evaluated by MTT assay.

Supplementary Fig. 4 Activation of BMDCs and RAW264.7 after incubation with YCW NPs with different sizes.

Supplementary Fig. 5 Activation of BMDCs induced by YCW particles.

Supplementary Fig. 6 Flow cytometry gating strategy for analysis of BMDCs maturation.

Supplementary Fig. 7 Complete initial data of western blotting analysis of Dectin-1 / Syk pathway and TLR2 / MyD88 pathway.

Supplementary Fig. 8 The influence of YCW NPs on T cells in vitro.

Supplementary Fig. 9 Dose-response experiment for antitumor response.

Supplementary Fig. 10 YCW NPs inhibited tumor growth by remodeling immunosuppressive tumor microenvironment.

Supplementary Fig. 11 Flow cytometry gating strategy for analysis of different cells in tumor.

Supplementary Fig. 12 Distribution of YCW micro-particles (MPs).

Supplementary Fig. 13 Distribution of YCW NPs in vivo.

Supplementary Fig. 14 Flow cytometry gating strategy for analysis of T cells in blood.

Supplementary Fig. 15 H&E staining and flow cytometry analysis of TME after therapeutic.

Supplementary Fig. 16 Combination therapeutic with small size YCW NPs and anti-PD-L1 for B16.

Supplementary Fig. 17 Treatment efficiency of YCW small NPs and YCW MPs (GPs).

**Supplementary Table 1. Materials used in study.**

| <b>Antibodies</b>                     | <b>Manufacturer</b>          | <b>Catalog Number</b>                        | <b>Dilutions</b>    |
|---------------------------------------|------------------------------|----------------------------------------------|---------------------|
| FITC anti-mouse CD3                   | Biologend                    | 100204                                       | 1:200               |
| APC anti-mouse CD4                    | Biologend                    | 100412                                       | 1:200               |
| PE anti-mouse CD8a                    | Biologend                    | 100708                                       | 1:200               |
| FITC anti-mouse CD11c                 | Biologend                    | 117306                                       | 1:200               |
| APC anti-mouse Ly-6G/Ly-6C<br>(Gr-1)  | Biologend                    | 108412                                       | 1:200               |
| FITC anti-mouse F4/80                 | Biologend                    | 123108                                       | 1:200               |
| PE anti-mouse CD206 (MMR)             | Biologend                    | 141706                                       | 1:200               |
| FITC anti-mouse CD45                  | Biologend                    | 103108                                       | 1:200               |
| PerCP anti-mouse/human<br>CD11b       | Biologend                    | 101230                                       | 1:200               |
| PE anti-mouse FOXP3                   | Biologend                    | 126403                                       | 1:200               |
| APC anti-mouse CD80                   | Biologend                    | 104714                                       | 1:200               |
| PE anti-mouse CD86                    | Biologend                    | 105008                                       | 1:200               |
| PE anti-mouse CD274 (B7-H1,<br>PD-L1) | Biologend                    | 124308                                       | 1:200               |
| APC anti-mouse CD279 (PD-<br>1)       | Biologend                    | 135209                                       | 1:200               |
| PE anti-mouse I-A/I-E                 | Biologend                    | 107608                                       | 1:200               |
| APC anti-mouse CD40                   | Biologend                    | 124612                                       | 1:200               |
| APC anti-mouse CD69                   | Biologend                    | 104514                                       | 1:200               |
| PE anti-mouse CD19                    | Biologend                    | 15508                                        | 1:200               |
| Anti-CD4                              | BioXcell                     | BE0004-1;<br>Clone: 53-6.7                   | Diluted to 100 g/mL |
| Anti-CD8a                             | BioXcell                     | BE0003-1;<br>Clone: GK1.5                    | Diluted to 100 g/mL |
| Anti-PD-L1                            | BioXcell                     | BE0101;<br>Clone: 10F. 9G2;<br>Lot: 751219D1 | Diluted to 100 g/mL |
| Anti-p-P65                            | Abclonal                     | AP0475                                       | 1:1000              |
| Anti-GAPDH                            | Servicebio                   | GB11002                                      | 1:1000              |
| Anti-TLR-2                            | Abcam                        | ab209216                                     | 1:1000              |
| Anti-p-Syk                            | Cell Signaling<br>Technology | #2710                                        | 1:1000              |
| Anti-MyD88                            | Abcam                        | ab219413                                     | 1:1000              |
| Anti-Dectin-1                         | Absin                        | abs124190                                    | 1:1000              |
| Goat anti-Rabbit IgG (H+L)-<br>HRP    | Ray Antibody                 | RM3002                                       | 1:5000              |

|                                               |               |           |  |
|-----------------------------------------------|---------------|-----------|--|
| <b>Yeast</b>                                  |               |           |  |
| Yeast from<br><i>Saccharomyces Cerevisiae</i> | Sigma-aldrich | ysc2-500g |  |
| <b>Inhibitor</b>                              |               |           |  |
| Laminarin                                     | Sigma-aldrich | 9008-22-4 |  |
| C29                                           | Cayman        | 27029     |  |

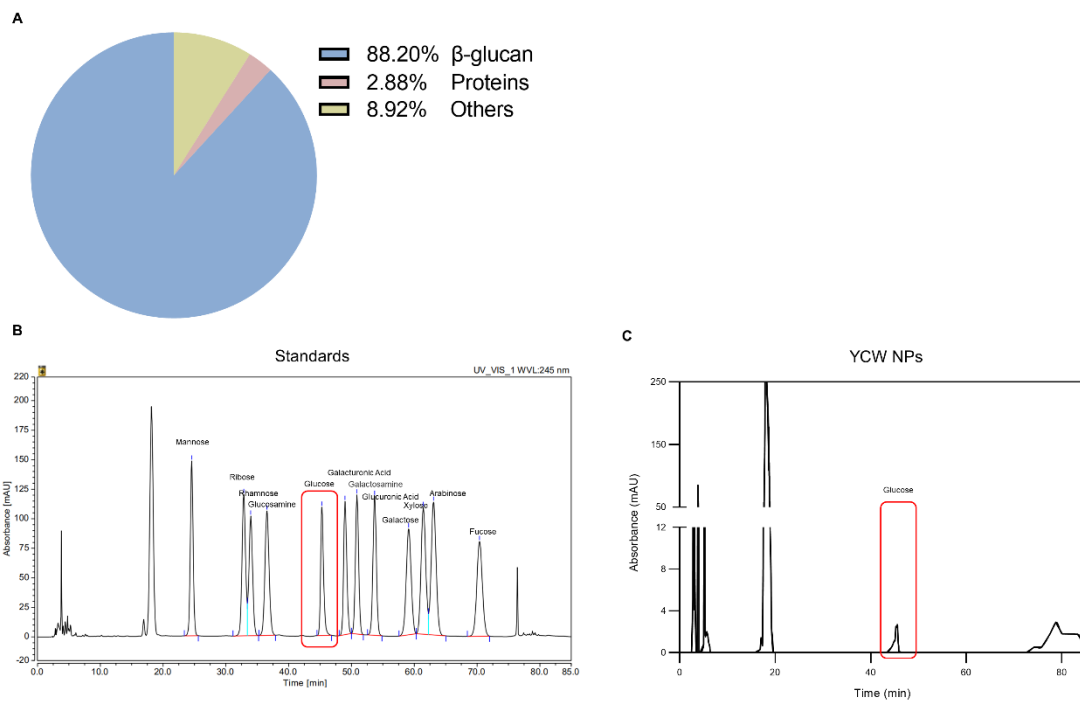

**Supplementary Fig. 1. The composition of YCW NPs. (A)** The composition of YCW nanoparticles. **(B)** Monosaccharide standard high performance liquid chromatography (HPLC) curve. **(C)** Monosaccharide curve of YCW NPs.

| Protein Group | Protein ID | Accession          | -logP  | PTM                                                        | Avg. Mass | Description                                                                                                                                          |
|---------------|------------|--------------------|--------|------------------------------------------------------------|-----------|------------------------------------------------------------------------------------------------------------------------------------------------------|
| 23            | 15         | P60010.ACT.YEAST   | 156.24 |                                                            | 41690     | Actin O5-Saccharomyces cerevisiae (strain ATCC 204508 / S288c) OX=559292 GN=ACT1 PE=1 SV=1                                                           |
| 20            | 24         | P07251.ATPA.YEAST  | 139.36 | Oxidation (HW)                                             | 536808    | ATP synthase subunit alpha m Mitochondrion O5-Saccharomyces cerevisiae (strain ATCC 204508 / S288c) OX=559292 GN=ATP1 PE=1 SV=5                      |
| 12            | 42         | P02992.EFTU.YEAST  | 116.47 | Acetylation (N-term); Oxidation (HW)                       | 47872     | Elongation factor Tu m Mitochondrion O5-Saccharomyces cerevisiae (strain ATCC 204508 / S288c) OX=559292 GN=EFT1 PE=1 SV=1                            |
| 30            | 50         | P05030.PM.A1.YEAST | 110.87 | Carbamion ethylation; Oxidation (HW)                       | 99619     | Plasma membrane ATPase 1 O5-Saccharomyces cerevisiae (strain ATCC 204508 / S288c) OX=559292 GN=PM.A1 PE=1 SV=2                                       |
| 35            | 105        | P00925.ENO.2.YEAST | 101.23 |                                                            | 46814     | Enolase 2 O5-Saccharomyces cerevisiae (strain ATCC 204508 / S288c) OX=559292 GN=ENO.2 PE=1 SV=3                                                      |
| 35            | 113        | P00924.ENO.1.YEAST | 101.23 |                                                            | 46816     | Enolase 1 O5-Saccharomyces cerevisiae (strain ATCC 204508 / S288c) OX=559292 GN=ENO.1 PE=1 SV=3                                                      |
| 31            | 66         | P00331.ADH.2.YEAST | 96.07  | Carbamion ethylation; Acetylation (N-term)                 | 36732     | Alcohol dehydrogenase 2 O5-Saccharomyces cerevisiae (strain ATCC 204508 / S288c) OX=559292 GN=ADH.2 PE=1 SV=3                                        |
| 31            | 36         | P00330.ADH.1.YEAST | 96.07  | Carbamion ethylation; Acetylation (N-term); Oxidation (HW) | 36849     | Alcohol dehydrogenase 1 O5-Saccharomyces cerevisiae (strain ATCC 204508 / S288c) OX=559292 GN=ADH.1 PE=1 SV=5                                        |
| 37            | 252        | P00830.ATP.9.YEAST | 95.58  |                                                            | 54794     | ATP synthase subunit beta m Mitochondrion O5-Saccharomyces cerevisiae (strain ATCC 204508 / S288c) OX=559292 GN=ATP2 PE=1 SV=2                       |
| 38            | 160        | P39954.SAHH.YEAST  | 89.76  | Carbamion ethylation                                       | 49126     | Adenosylhomocysteinase O5-Saccharomyces cerevisiae (strain ATCC 204508 / S288c) OX=559292 GN=SAH1 PE=1 SV=1                                          |
| 32            | 168        | P02994.EF1A.YEAST  | 88.56  |                                                            | 50033     | Elongation factor 1-alpha O5-Saccharomyces cerevisiae (strain ATCC 204508 / S288c) OX=559292 GN=EF1A PE=1 SV=1                                       |
| 40            | 99         | P02309.H.4.YEAST   | 87.2   |                                                            | 11368     | Histone H4 O5-Saccharomyces cerevisiae (strain ATCC 204508 / S288c) OX=559292 GN=H4 PE=1 SV=2                                                        |
| 34            | 138        | P00549.KPK1.YEAST  | 84.24  | Carbamion ethylation                                       | 54545     | Pyruvate kinase 1 O5-Saccharomyces cerevisiae (strain ATCC 204508 / S288c) OX=559292 GN=CK1 PE=1 SV=2                                                |
| 36            | 98         | P00560.PCK.YEAST   | 83.01  |                                                            | 44738     | Phosphoglycerate kinase O5-Saccharomyces cerevisiae (strain ATCC 204508 / S288c) OX=559292 GN=PGK1 PE=1 SV=2                                         |
| 41            | 1031       | Q12692.P2A.Z.YEAST | 71.6   |                                                            | 14283     | Histone H2A.Z O5-Saccharomyces cerevisiae (strain ATCC 204508 / S288c) OX=559292 GN=HTZ1 PE=1 SV=3                                                   |
| 56            | 335        | P05750.RS3.YEAST   | 58.02  |                                                            | 26503     | 40S ribosomal protein S3 O5-Saccharomyces cerevisiae (strain ATCC 204508 / S288c) OX=559292 GN=RPS3 PE=1 SV=5                                        |
| 48            | 204        | P28708.DH.5.YEAST  | 52.46  | Oxidation (HW)                                             | 49627     | NAD-specific glutamate dehydrogenase 2 O5-Saccharomyces cerevisiae (strain ATCC 204508 / S288c) OX=559292 GN=GDH3 PE=3 SV=1                          |
| 48            | 293        | P07282.DH.4.YEAST  | 52.46  |                                                            | 49570     | NAD-specific glutamate dehydrogenase 1 O5-Saccharomyces cerevisiae (strain ATCC 204508 / S288c) OX=559292 GN=GDH1 PE=1 SV=2                          |
| 53            | 2043       | P23515.VATL1.YEAST | 51.44  | Carbamion ethylation                                       | 16351     | V-type proton ATPase subunit c O5-Saccharomyces cerevisiae (strain ATCC 204508 / S288c) OX=559292 GN=VMA3 PE=1 SV=1                                  |
| 60            | 6467       | Q06892.DSW.1.YEAST | 50.67  |                                                            | 32758     | Outer sporopollenin O5-Saccharomyces cerevisiae (strain ATCC 204508 / S288c) OX=559292 GN=OSH.1 PE=4 SV=1                                            |
| 44            | 278        | P22292.HSP71.YEAST | 48.58  | Acetylation (N-term)                                       | 69651     | Heat shock protein 71 O5-Saccharomyces cerevisiae (strain ATCC 204508 / S288c) OX=559292 GN=HSP71 PE=1 SV=3                                          |
| 44            | 127        | P09435.HSP72.YEAST | 48.58  | Acetylation (N-term)                                       | 70547     | Heat shock protein 72 O5-Saccharomyces cerevisiae (strain ATCC 204508 / S288c) OX=559292 GN=HSP72 PE=1 SV=3                                          |
| 47            | 74         | P00380.E3P1.YEAST  | 44.68  | Carbamion ethylation                                       | 33750     | Glyceroldehyde-3-phosphate dehydrogenase 1 O5-Saccharomyces cerevisiae (strain ATCC 204508 / S288c) OX=559292 GN=TDH1 PE=1 SV=3                      |
| 55            | 236        | P80210.PUR1.YEAST  | 43.86  |                                                            | 48279     | Adenylsuccinate synthetase O5-Saccharomyces cerevisiae (strain ATCC 204508 / S288c) OX=559292 GN=ADU12 PE=1 SV=3                                     |
| 42            | 180        | Q06108.RG.C1.YEAST | 42.56  |                                                            | 120395    | Regulator of the glyceraldehyde 3-phosphate dehydrogenase 1 O5-Saccharomyces cerevisiae (strain ATCC 204508 / S288c) OX=559292 GN=RG.C1 PE=1 SV=1    |
| 49            | 283        | P15179.SYDM.YEAST  | 41.88  |                                                            | 75461     | Aspartate-BNA ligase m Mitochondrion O5-Saccharomyces cerevisiae (strain ATCC 204508 / S288c) OX=559292 GN=M.SD1 PE=1 SV=1                           |
| 45            | 2778       | P53312.SUCB.YEAST  | 41.27  |                                                            | 46901     | Succinate-CoA ligase (ADP-forming) subunit beta m Mitochondrion O5-Saccharomyces cerevisiae (strain ATCC 204508 / S288c) OX=559292 GN=LSC2 PE=1 SV=1 |
| 46            | 86         | P18892.HSP90.YEAST | 41.23  |                                                            | 60752     | Heat shock protein 90 m Mitochondrion O5-Saccharomyces cerevisiae (strain ATCC 204508 / S288c) OX=559292 GN=HSP90 PE=1 SV=1                          |
| 51            | 1996       | P38136.MAL31.YEAST | 40.55  |                                                            | 68263     | Maltose permease MAL31 O5-Saccharomyces cerevisiae (strain ATCC 204508 / S288c) OX=559292 GN=MAL31 PE=1 SV=1                                         |
| 54            | 985        | P02294.H2B2.YEAST  | 39.98  |                                                            | 14237     | Histone H2B.2 O5-Saccharomyces cerevisiae (strain ATCC 204508 / S288c) OX=559292 GN=H2B2 PE=1 SV=2                                                   |

**Supplementary Table 2. Specific information on the proteins contained in YCW NPs.**

| Number |                   | Retention Time (min) | Peak Area (mAU*min) | Peak Hight (mAU) | Relative peak area (%) | Relative peak height (%) | Sample Amount (ug/g) |
|--------|-------------------|----------------------|---------------------|------------------|------------------------|--------------------------|----------------------|
| 1      | Mannose           | 24.547               | 76.931              | 147.967          | 8.17                   | 11.20                    | 30.5912              |
| 2      | Ribose            | 32.843               | 80.046              | 119.705          | 8.50                   | 9.06                     | 30.7059              |
| 3      | Rhamnose          | 33.957               | 68.725              | 101.261          | 7.30                   | 7.67                     | 37.8932              |
| 4      | Glucosamine       | 36.543               | 81.359              | 105.265          | 8.64                   | 7.97                     | 36.1403              |
| 5      | Glucose           | 45.287               | 58.693              | 108.620          | 6.23                   | 8.22                     | 29.5305              |
| 6      | Galacturonic Acid | 48.975               | 64.962              | 112.869          | 6.90                   | 8.54                     | 32.1512              |
| 7      | Galactosamine     | 50.873               | 71.417              | 117.822          | 7.58                   | 8.92                     | 29.5746              |
| 8      | Glucuronic Acid   | 53.685               | 75.380              | 117.666          | 8.00                   | 8.91                     | 40.5044              |
| 9      | Galactose         | 59.113               | 82.683              | 89.621           | 8.78                   | 6.78                     | 32.4719              |
| 10     | Xylose            | 61.437               | 94.660              | 107.369          | 10.05                  | 8.13                     | 33.4831              |
| 11     | Arabinose         | 63.068               | 103.582             | 112.464          | 11.00                  | 8.51                     | 35.7434              |
| 12     | Fucose            | 70.398               | 83.388              | 80.295           | 8.85                   | 6.08                     | 31.5859              |
| Total  |                   |                      | 941.827             | 1320.923         | 100.00                 | 100.00                   |                      |

| Number |                   | Retention Time (min) | Peak Area (mAU*min) | Peak Hight (mAU) | Relative peak area (%) | Relative peak height (%) | Sample Amount (ug/g) |
|--------|-------------------|----------------------|---------------------|------------------|------------------------|--------------------------|----------------------|
| n.a.   | Mannose           | n.a.                 | n.a.                | n.a.             | n.a.                   | n.a.                     | n.a.                 |
| n.a.   | Ribose            | n.a.                 | n.a.                | n.a.             | n.a.                   | n.a.                     | n.a.                 |
| n.a.   | Rhamnose          | n.a.                 | n.a.                | n.a.             | n.a.                   | n.a.                     | n.a.                 |
| n.a.   | Glucosamine       | n.a.                 | n.a.                | n.a.             | n.a.                   | n.a.                     | n.a.                 |
| 1      | Glucose           | 45.340               | 2.006               | 2.157            | 100.0                  | 100.00                   | 221.1620             |
| n.a.   | Galacturonic Acid | n.a.                 | n.a.                | n.a.             | n.a.                   | n.a.                     | n.a.                 |
| n.a.   | Galactosamine     | n.a.                 | n.a.                | n.a.             | n.a.                   | n.a.                     | n.a.                 |
| n.a.   | Glucuronic Acid   | n.a.                 | n.a.                | n.a.             | n.a.                   | n.a.                     | n.a.                 |
| n.a.   | Galactose         | n.a.                 | n.a.                | n.a.             | n.a.                   | n.a.                     | n.a.                 |
| n.a.   | Xylose            | n.a.                 | n.a.                | n.a.             | n.a.                   | n.a.                     | n.a.                 |
| n.a.   | Arabinose         | n.a.                 | n.a.                | n.a.             | n.a.                   | n.a.                     | n.a.                 |
| n.a.   | Fucose            | n.a.                 | n.a.                | n.a.             | n.a.                   | n.a.                     | n.a.                 |
| Total  |                   |                      | 2.006               | 2.157            | 100.00                 | 100.00                   |                      |

**Supplementary Table 3. Specific information of mass spectrometry data of monosaccharide.**

Standards (up) and YCW NPs (down).

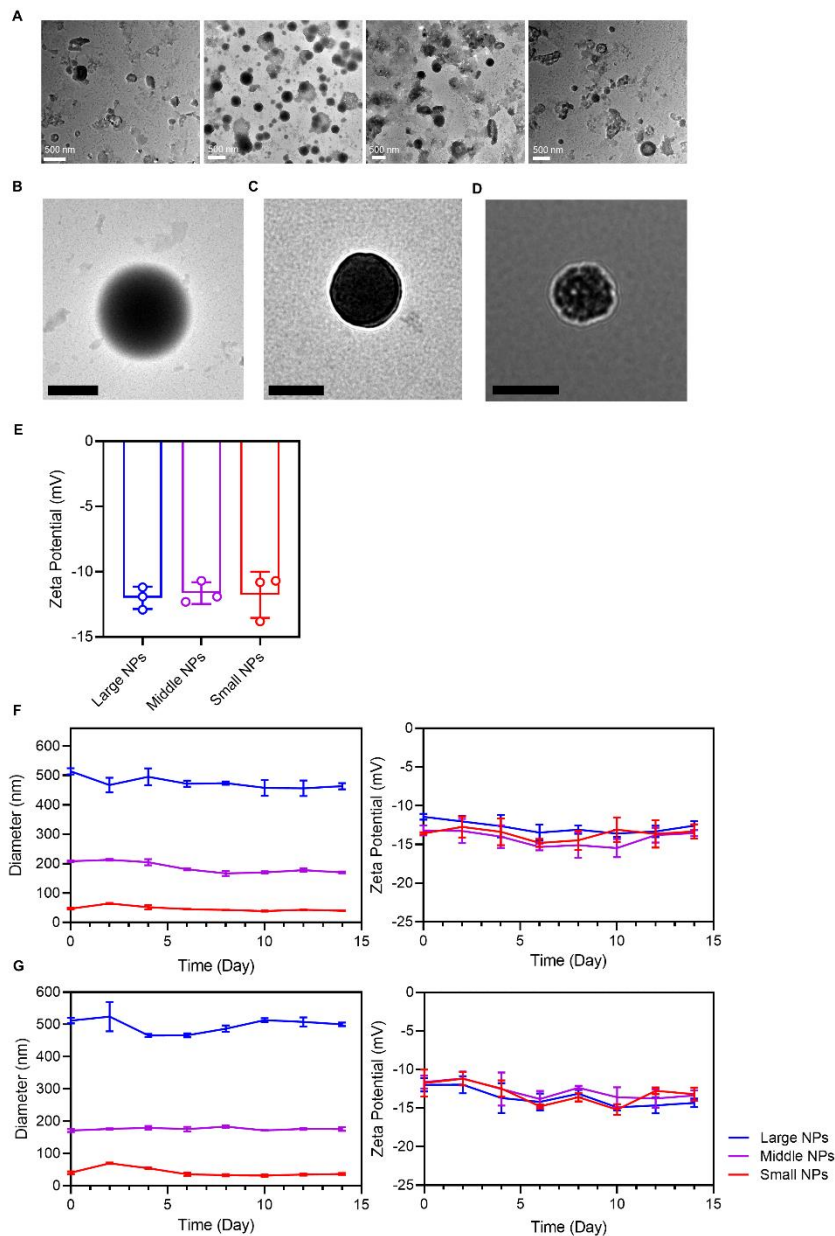

**Supplementary Fig. 2 (related to Figure 1). Characterization of YCW NPs with different sizes.**

(A) TEM of mixture nanoparticles (Scale bar = 500 nm). We found that most of the broken particles were spherical or quasi-spherical, whereas NPs with irregular shape were also observed. (B) TEM of large size of YCW NPs (Scale bar = 500 nm). (C) TEM of middle size of YCW NPs (Scale bar = 100 nm). (D) TEM of small size of YCW NPs (Scale bar = 50 nm). (E) Zeta potential of YCW NPs with different sizes (n = 3). (F-G) Diameter and zeta potential of three different size of YCW NPs within two weeks to monitor the stability of YCW NPs (n = 3). (F) RT. (G) 4°C. Data are means ± SD.



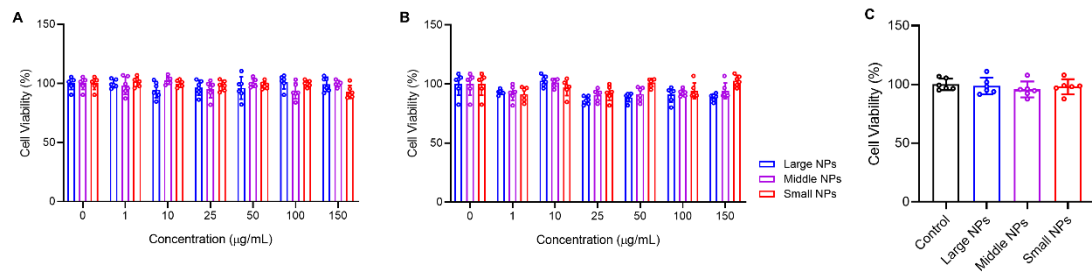

**Supplementary Fig. 3. In vitro cytotoxicity assessment evaluated by MTT assay. (A) Dendritic cells. (B) Macrophages. (C) B16 (the concentration of YCW NPs was 150 µg/mL) (n=6). Data are means ± SD.**

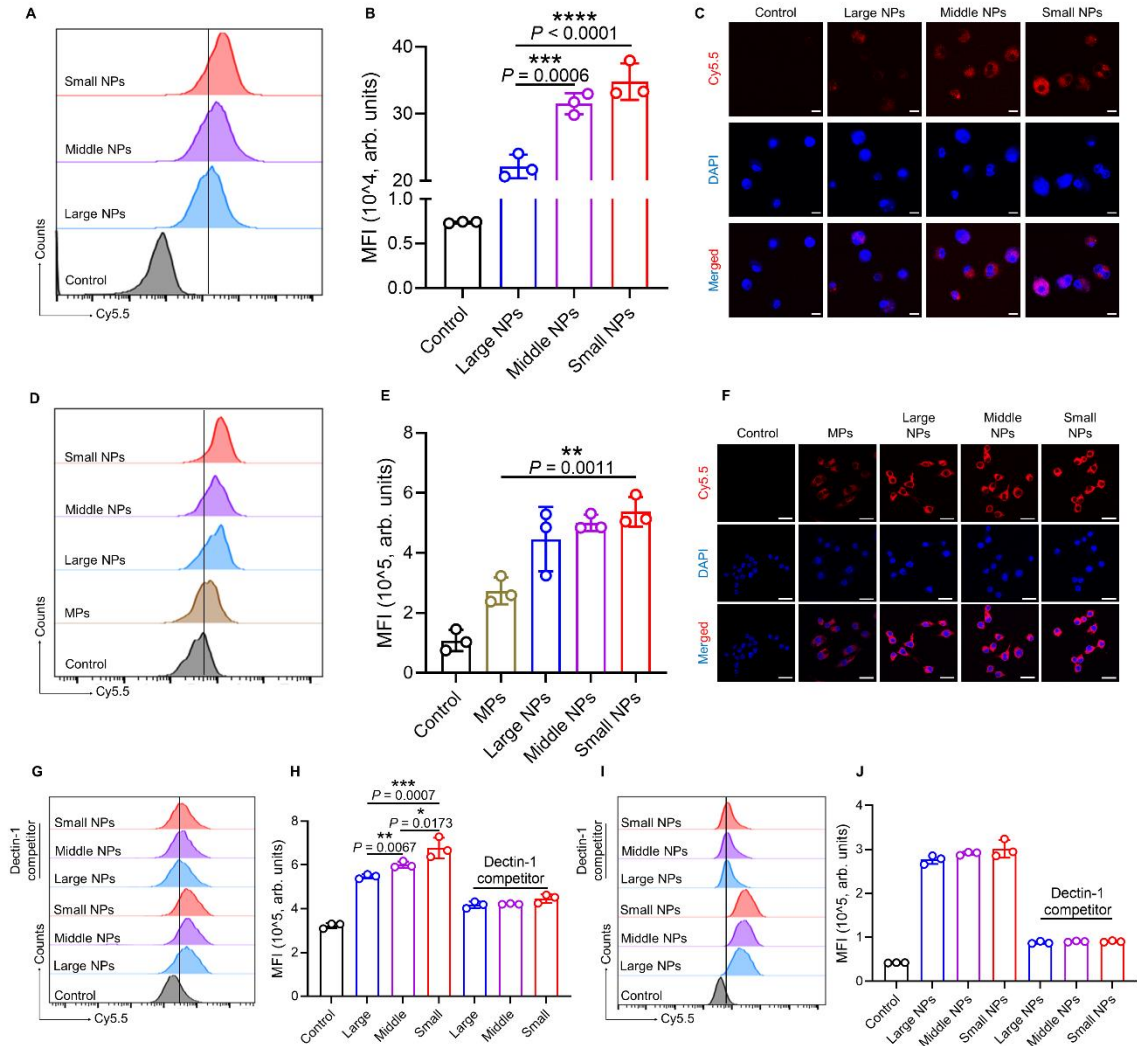

**Supplementary Fig. 4. Activation of BMDCs and RAW264.7 after incubation with YCW NPs with different sizes.** (A) Representative flow cytometric analysis of Cy5.5 expression and (B) corresponding quantitative analysis of Cy5.5 expression on BMDCs after incubation with Cy5.5-labelled YCW NPs with different sizes for 24 h (n = 3). (C) Confocal imaging of Cy5.5-labelled YCW particles with different sizes after incubation with BMDCs for 24 h (blue: DAPI; red: Cy5.5; Scale bar = 10  $\mu$ m, n = 3). (D) Representative flow cytometric analysis of Cy5.5 expression on RAW264.7 after incubation with Cy5.5-labelled YCW particles (including MPs, Large NPs, Middle NPs, Small NPs) for 24 h. (E) The corresponding quantification of Cy5.5 (MFI) after RAW264.7 incubation with Cy5.5-labelled particles for 24 h (n = 3). (F) Confocal imaging of Cy5.5-labelled YCW particles with different sizes after incubation with RAW264.7 for 24 h (blue: DAPI; red: Cy5.5; Scale bar = 20  $\mu$ m, n = 3). (G) Representative flow cytometric analysis and (H) corresponding quantification of Cy5.5 (MFI) after incubation of DC2.4 with Cy5.5-labelled YCW particles for 24 h (n = 3). (I)

Representative flow cytometric analysis and **(J)** corresponding quantification of Cy5.5 (MFI) after incubation of RAW264.7 with Cy5.5-labelled YCW particles for 24 h (n = 3). Statistical significance was obtained by one-way ANOVA using the Tukey post-test. \*\*\*\*  $P < 0.0001$ ; \*\*\*  $P < 0.005$ ; \*\*  $P < 0.01$ ; \*  $P < 0.05$ . Data are means  $\pm$  SD. MFI: mean fluorescence intensity; arb. units: arbitrary units.

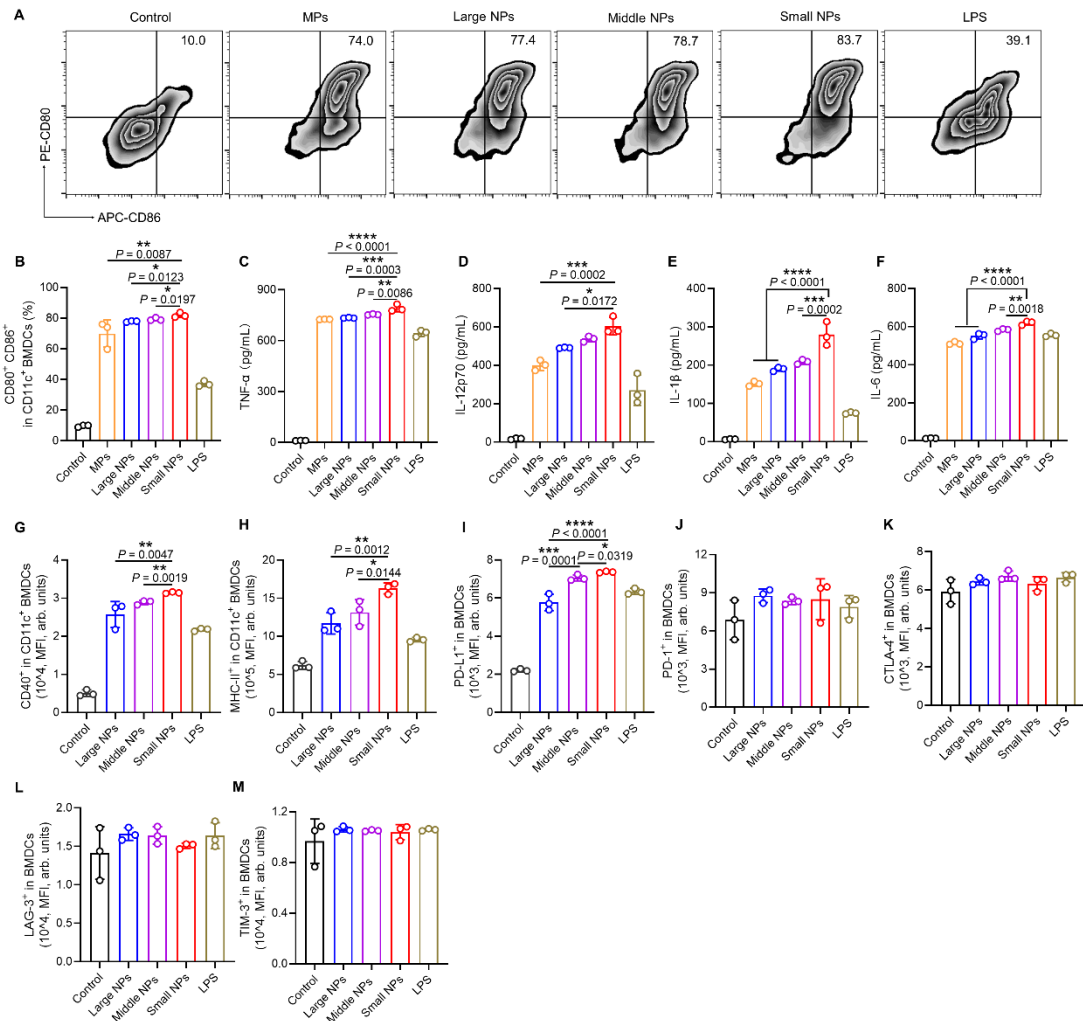

**Supplementary Fig. 5 (related to Figure 2). Activation of BMDCs induced by YCW particles.**

(A-B) Activation of BMDCs after BMDCs incubation with YCW particles, including MPs, large NPs, middle NPs, small NPs and LPS (positive control) for 24 h. (A) Representative dot plots of co-stimulatory molecules CD80 and CD86 expression on BMDCs and (B) corresponding quantification of BMDCs maturation (n = 3). (C-F) Concentration of pro-inflammatory cytokines secreted by BMDCs after incubation with YCW particles as indicated. (C) TNF- $\alpha$ ; (D) IL-12p70; (E) IL-1 $\beta$ ; (F) IL-6 (n = 3). (G) The corresponding quantification of CD40 expression on BMDCs after YCW NPs incubation with BMDCs for 24 h (n = 3). (H) The corresponding quantification of MHC II expression on BMDCs after YCW NPs incubation with BMDCs for 24 h (n = 3). (I) The corresponding quantification of PD-L1 expression on BMDCs after YCW NPs incubation with BMDCs for 24 h (n = 3). (J) The corresponding quantification of PD-1 expression on BMDCs after YCW NPs incubation with BMDCs for 24 h (n = 3). (K) The corresponding quantification of CTLA-4 expression on

BMDCs after YCW NPs incubation with BMDCs for 24 h (n = 3). **(L)** The corresponding quantification of LAG-3 expression on BMDCs after YCW NPs incubation with BMDCs for 24 h (n = 3). **(M)** The corresponding quantification of TIM-3 expression on BMDCs after YCW NPs incubation with BMDCs for 24 h (n = 3). Statistical significance was obtained by one-way ANOVA using the Tukey post-test. \*\*\*\*  $P < 0.0001$ ; \*\*\*  $P < 0.005$ ; \*\*  $P < 0.01$ ; \*  $P < 0.05$ . Data are means  $\pm$  SD. MFI: mean fluorescence intensity; arb. units: arbitrary units.

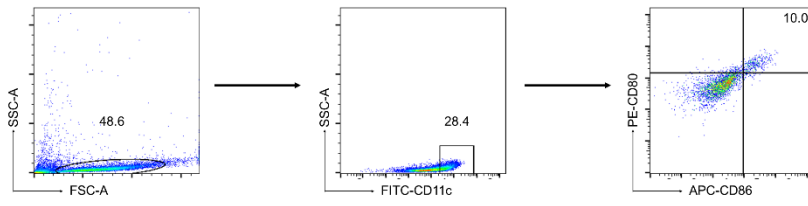

**Supplementary Fig. 6 (related to Figure 2).** Flow cytometry gating strategy for analysis of BMDCs maturation.

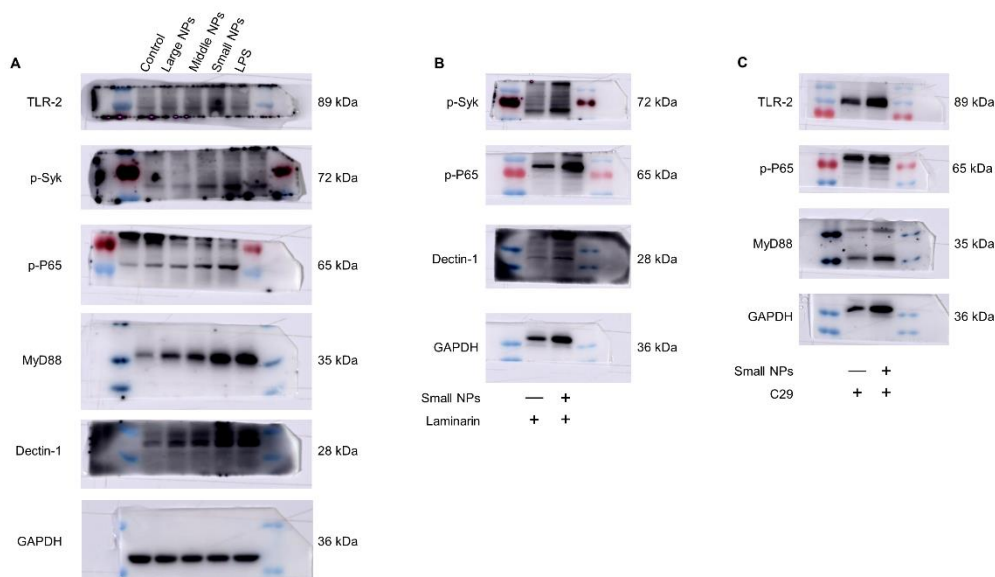

**Supplementary Fig. 7 (related to Figure 2). Complete initial data of western blotting analysis of Dectin-1 / Syk pathway and TLR2 / MyD88 pathway.** (A) Western blotting analysis of Dectin-1 / Syk pathway and TLR2 / MyD88 pathway from proteins of BMDCs after incubation with three YCW NPs and LPS for 24 h, including TLR2, p-Syk, p-P65, MyD88, Dectin-1. (B) After utilizing Dectin-1 competitor laminarin for 2 h, western blotting analysis of Dectin-1 / Syk pathway from proteins of BMDCs after incubation with Small NPs for 24 h, including p-Syk, p-P65, Dectin-1. (C) After utilizing TLR2 inhibitor C29 for 2 h, western blotting analysis of TLR2 / MyD88 pathway from proteins of BMDCs after incubation with Small NPs for 24 h, including p-P65, TLR2, MyD88 (n = 3, each experiment was repeated three times independently with similar results, and we chose one results to show).

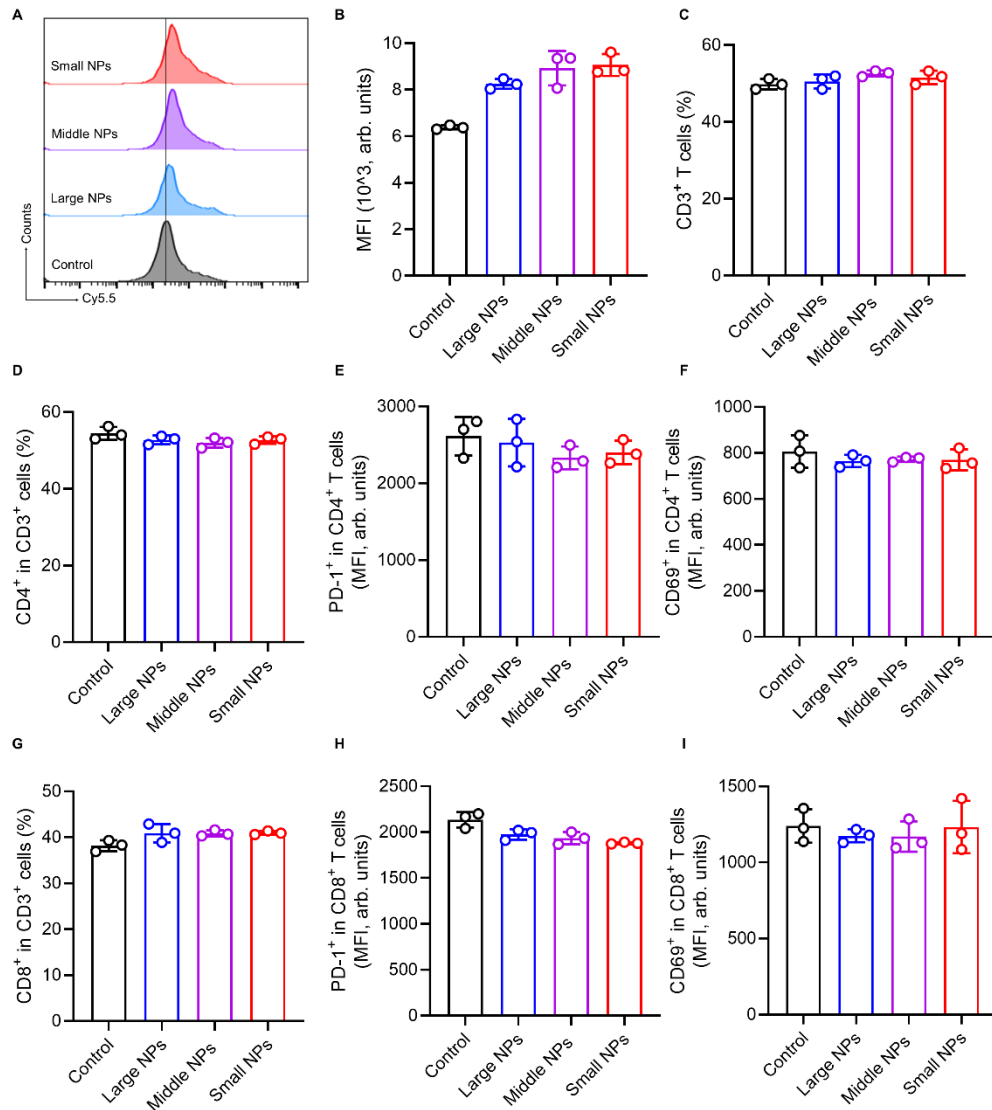

**Supplementary Fig. 8. The influence of YCW NPs on T cells in vitro.** (A) Representative flow cytometric analysis and (B) corresponding quantitative analysis of Cy5.5 intensity on T cells after incubation of T cells with Cy5.5-labelled YCW NPs (including large NPs, middle NPs, small NPs) for 24 h (n = 3). (C-I) Corresponding quantitative analysis of CD3 T cells (C); CD4<sup>+</sup> cells in CD3 cells (D); PD-1 expression on CD4<sup>+</sup> T cells (E); CD69 expression on CD4<sup>+</sup> T cells (F); CD8 expression on CD3 cells (G); PD-1 expression on CD8<sup>+</sup> T cells (H); CD69 expression on CD8<sup>+</sup> T cells (I) (n = 3). Statistical significance was obtained by one-way ANOVA using the Tukey post-test. Data are means ± SD. MFI: mean fluorescence intensity; arb. units: arbitrary units.



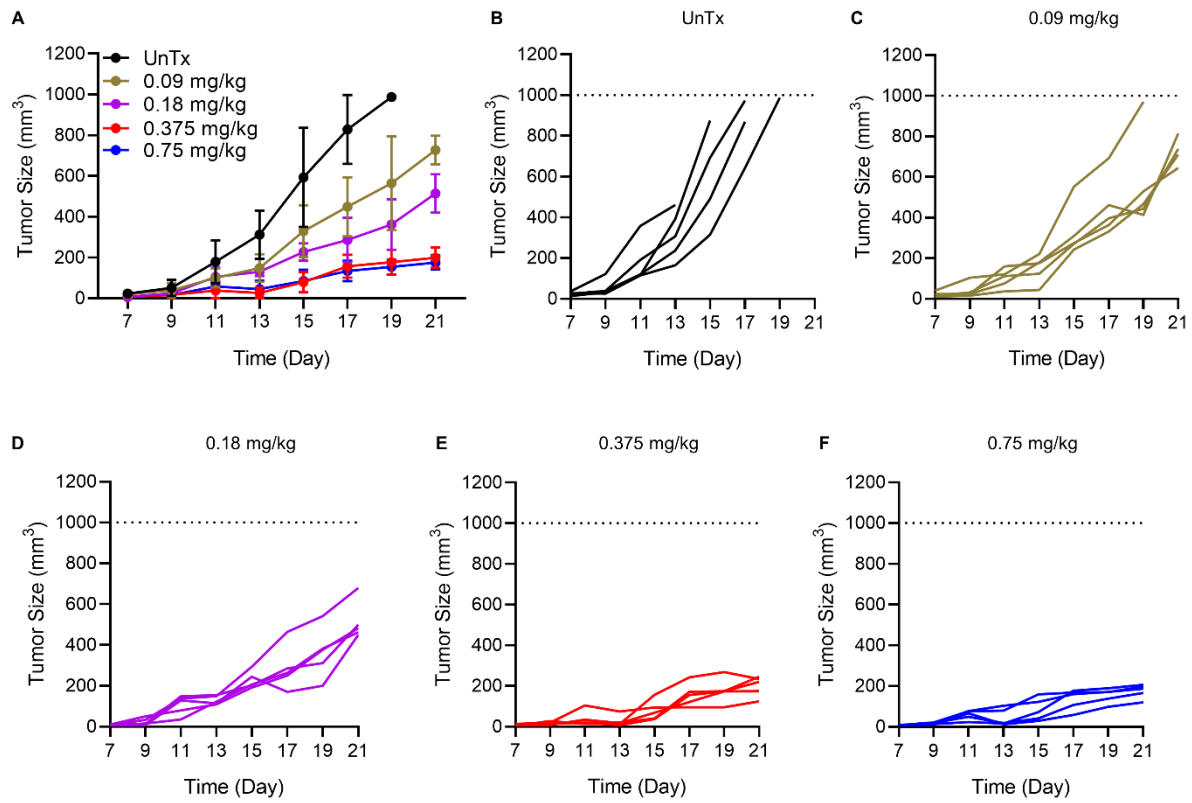

**Supplementary Fig. 9. Dose-response experiment for antitumor response.** (A) Average and (B-F) individual tumor growth curves in different dose group, including 0 mg/kg, 0.09 mg/kg, 0.18 mg/kg, 0.375 mg/kg and 0.75 mg/kg (n = 5). Data are means  $\pm$  SD.

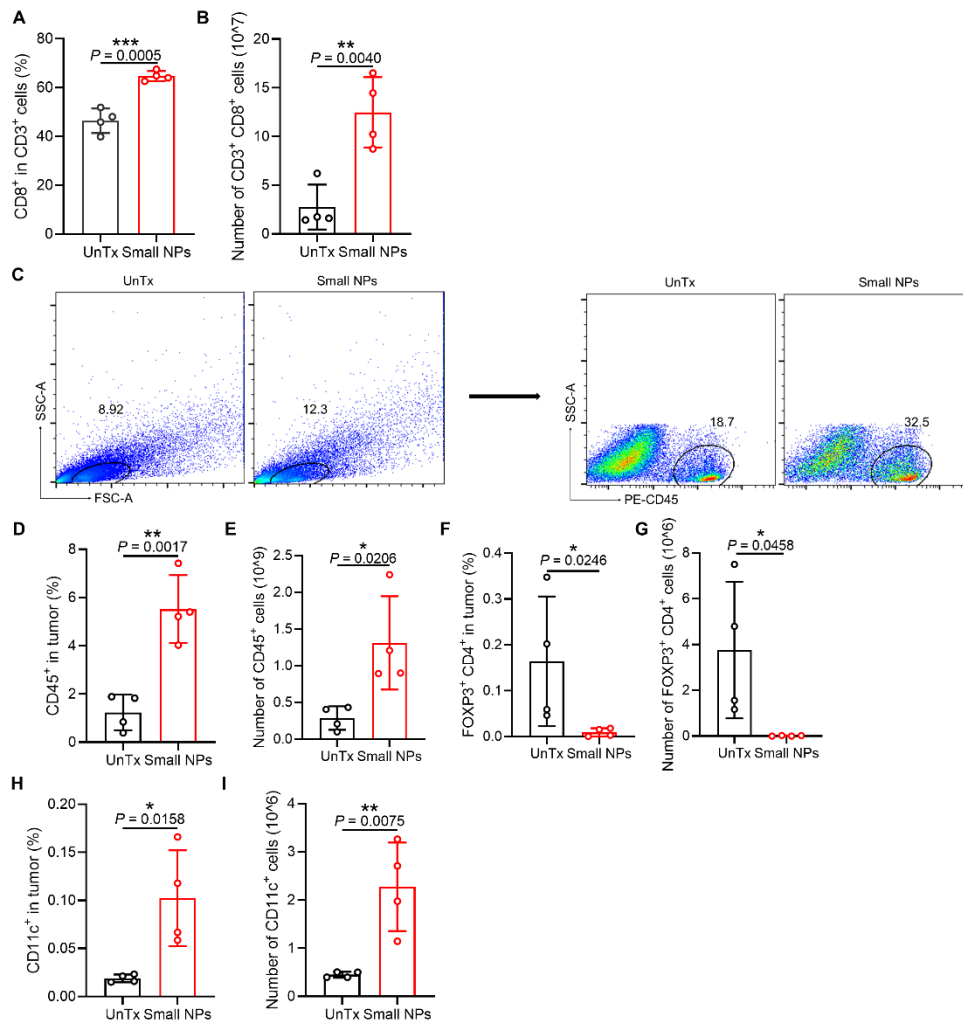

**Supplementary Fig. 10 (related to Figure 3). YCW NPs inhibited tumor growth by remodeling immunosuppressive tumor microenvironment. (A)** Proportion of CD8<sup>+</sup> T cells in CD3<sup>+</sup> T cells. **(B)** Absolute numbers of the CD8<sup>+</sup> of the tumor in UnTx group and small NPs group. **(C)** Representative flow cytometric analysis for CD45<sup>+</sup> in tumors and **(D)** corresponding quantitative analysis of untreated group and Small NPs group. **(E)** Absolute numbers of the CD45<sup>+</sup> of the tumor. **(F)** Corresponding quantitative analysis for FOXP3<sup>+</sup> CD4<sup>+</sup> in tumors of untreated group and small NPs group. **(G)** Absolute numbers of the CD4<sup>+</sup> FOXP3<sup>+</sup> of the tumor. **(H)** Corresponding quantitative analysis of untreated group and Small NPs group. **(I)** Absolute numbers of the CD11c<sup>+</sup> of the tumor (n = 4). Statistical significance was obtained by Student's t tests (two-tailed). \*\*\*  $P < 0.005$ ; \*\*  $P < 0.01$ ; \*  $P < 0.05$ . Data are means  $\pm$  SD.

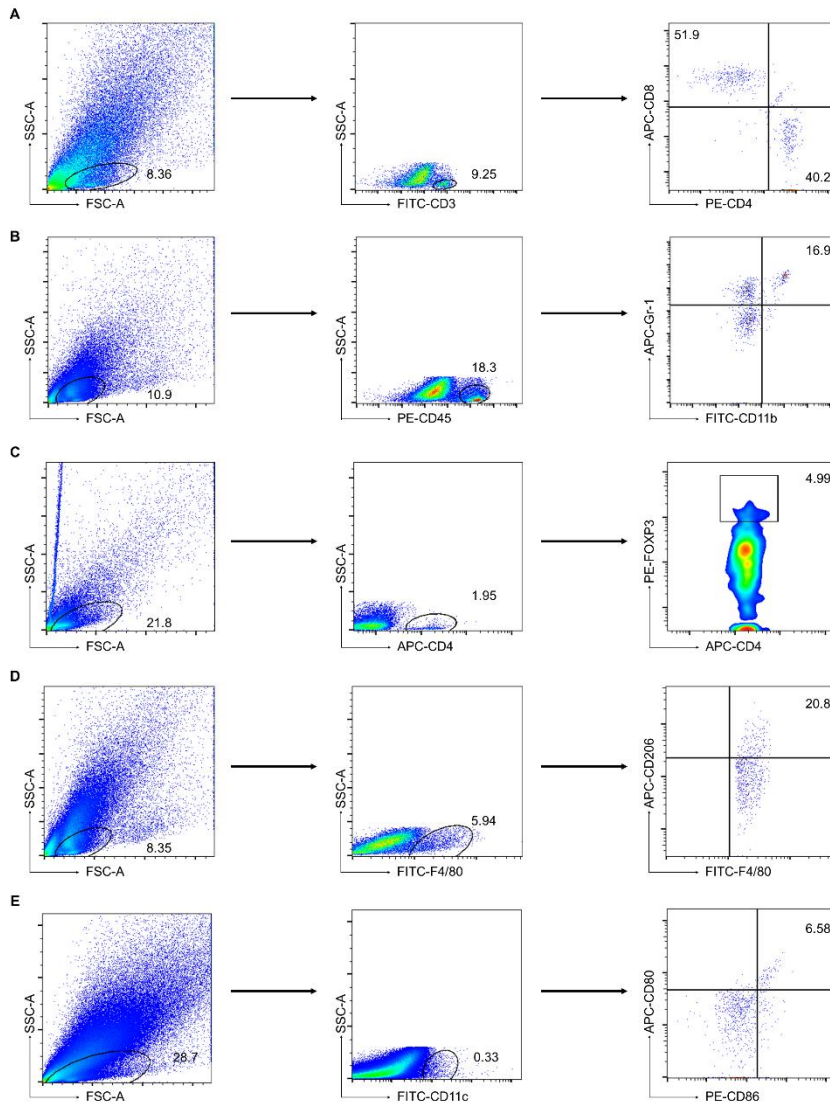

**Supplementary Fig. 11 (related to Figure 3). Flow cytometry gating strategy for analysis of different cells in tumor. (A) T cells; (B) MDSCs; (C) Tregs; (D) TAMs; (E) DC maturation.**



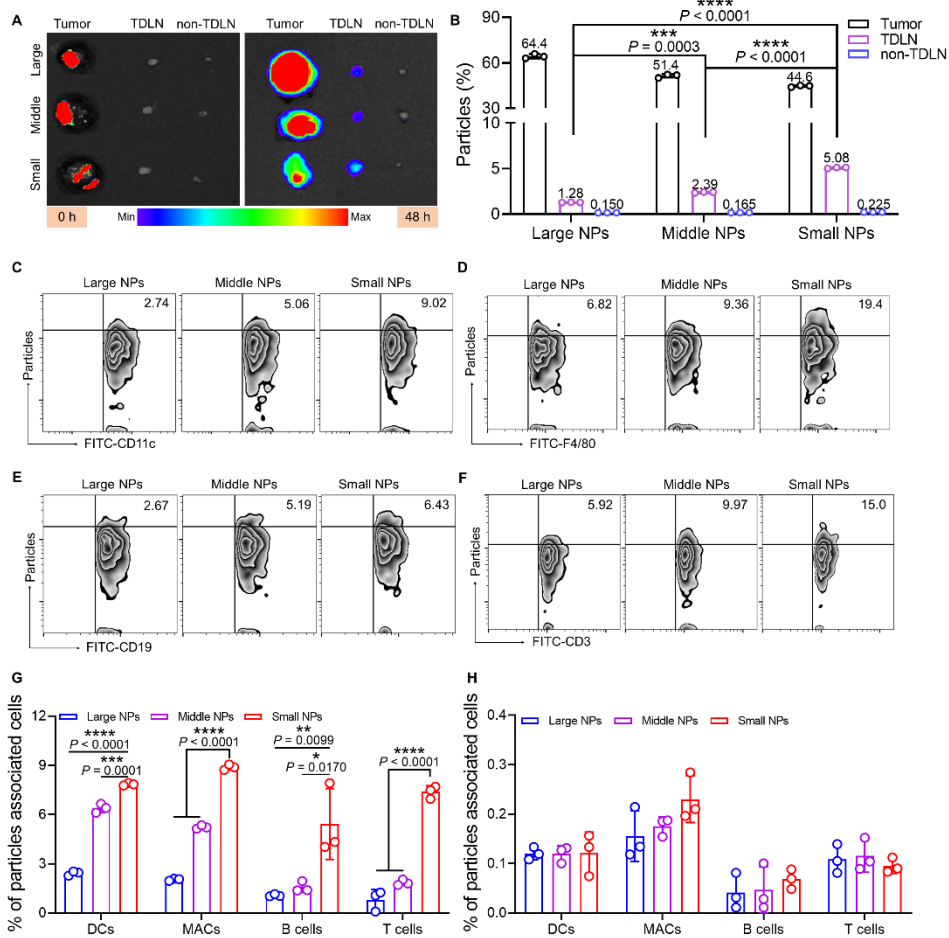

**Supplementary Fig. 13 (related to Figure 4). Distribution of YCW NPs in vivo.** (A) Fluorescence imaging of tumor, TDLN and non-TDLN ex vivo after injection of Cy5.5-labelled NPs for 48 h. (B) Proportions of NPs in tumor, TDLN and non-TDLN after injection of Cy5.5-labelled NPs for 48 h (n = 3). (C-F) Representative flow cytometric analysis of immune cells with TDLNs after injection of Cy5.5-labelled YCW NPs for 48 h. (C) DCs; (D) Macrophages; (E) B cells; (F) T cells. (G) Proportions of particles associated cells of tumor after intratumorally injection for 48 h (n = 3). (H) Proportions of particles associated cells of non-tumor draining lymph nodes after intratumorally injection for 48 h (n = 3). Statistical significance was obtained by one-way ANOVA using the Tukey post-test. \*\*\*\*  $P < 0.0001$ ; \*\*\*  $P < 0.005$ ; \*\*  $P < 0.01$ ; \*  $P < 0.05$ . Data are means  $\pm$  SD.

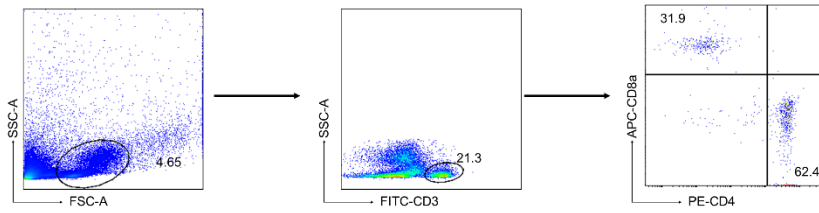

**Supplementary Fig. 14 (related to Figure 5).** Flow cytometry gating strategy for analysis of T cells in blood.

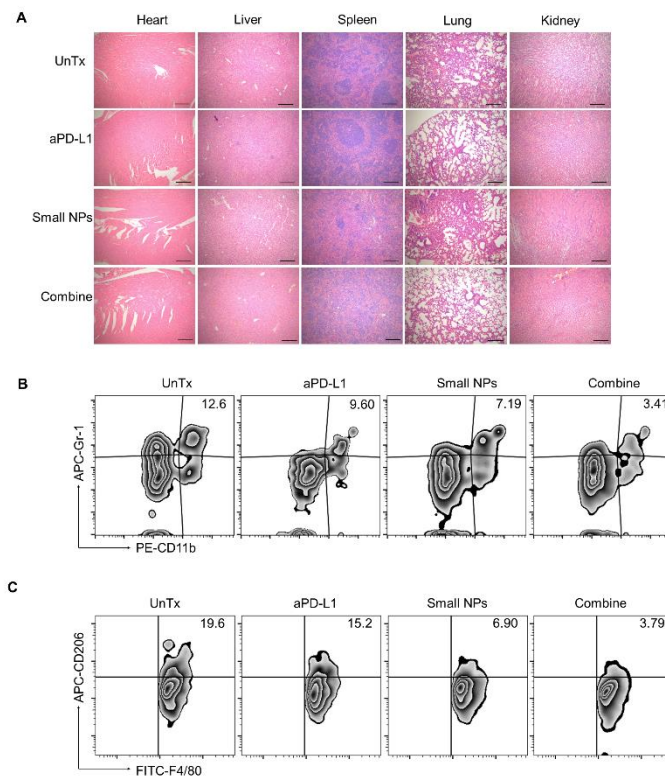

**Supplementary Fig. 15 (related to Figure 6).** H&E staining and flow cytometry analysis of TME after therapeutic. (A) H&E staining of major organs of each group after combination therapy (Scale bar = 200  $\mu$ m, n = 3). (B) Representative flow cytometry analysis of MDSCs and (C) representative flow cytometry analysis of TAMs within the tumors.

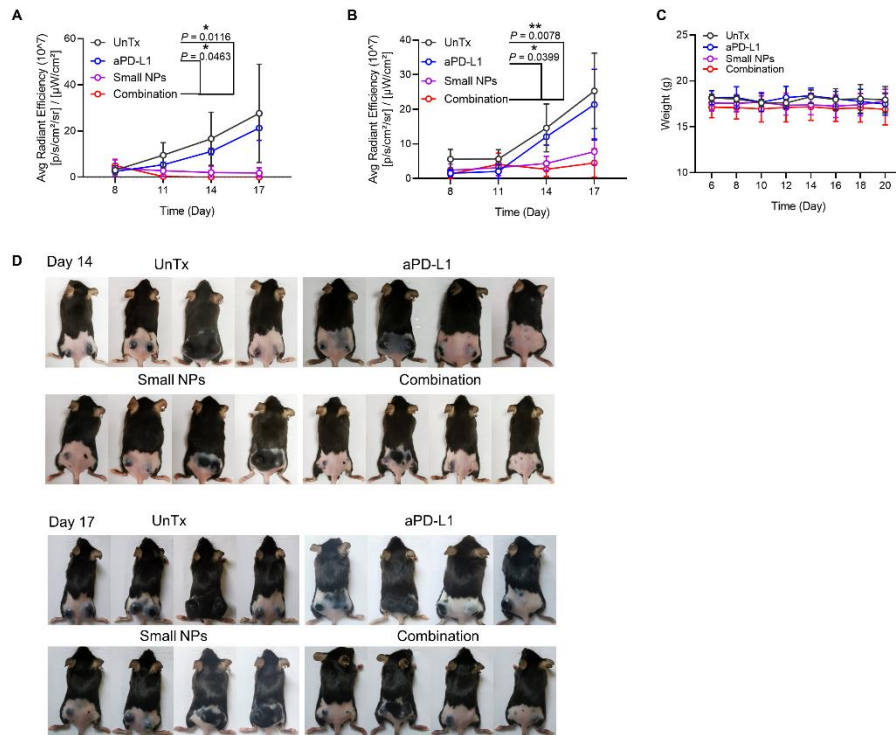

**Supplementary Fig. 16 (related to Figure 7). Combination therapeutic with small size YCW NPs and anti-PD-L1 for B16. (A-B)** Quantification of bioluminescence signal of primary tumors (A) and distant tumors (B) observed on day 8, 11, 14, 17 (UnTx: n = 4; aPD-L1: n = 3; Small NPs: n = 4; Combine: n = 4). (C) Weight curves of mice in different groups during treatment (n = 4). (D) Imaging of mice in four groups on day 14 and day 17. Statistical significance was obtained by Student's t tests (two-tailed). \*\*\*  $P < 0.005$ ; \*  $P < 0.05$ . Data are means  $\pm$  SD.

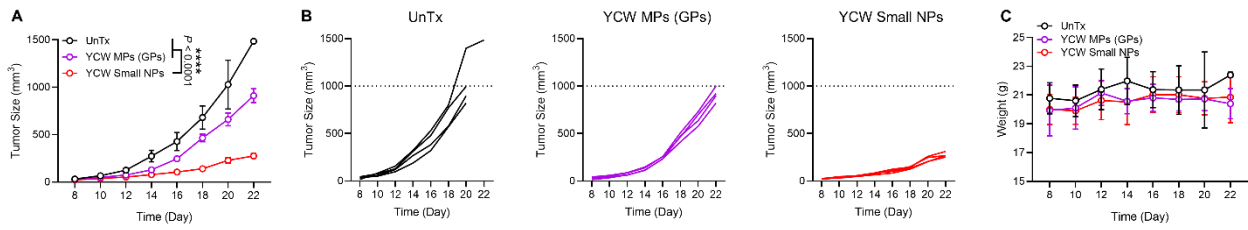

**Supplementary Fig. 17. Treatment efficiency of YCW small NPs and YCW MPs (GPs).** (A) Average and (B) individual tumor growth curves in different treatment group, including UnTx, YCW MPs (GPs), YCW small NPs (n = 4). (C) Weight of mice in three groups during treatment (n = 4). Statistical significance was obtained by one-way ANOVA using the Tukey post-test. \*\*\*\*  $P < 0.0001$ . Data are means  $\pm$  SD.
